# Supplementary material
Source: publisher site journal article supplement (https://www.dovepress.com/article/433514)

**Supplementary File 1. SNPs of OSA to Hypertention.**

| SNP         | beta. exposure | eaf. exposure | se. exposure | samplesize. exposure | SD          | R2          |
|-------------|----------------|---------------|--------------|----------------------|-------------|-------------|
| rs1023230   | -0.1107        | 0.9223        | 0.0232       | 217955               | 10.83107101 | 1.49719E-05 |
| rs10507084  | 0.1085         | 0.1793        | 0.0163       | 217955               | 7.609761097 | 5.98291E-05 |
| rs10860169  | -0.0653        | 0.2906        | 0.0137       | 217955               | 6.395934173 | 4.29769E-05 |
| rs10910079  | 0.1601         | 0.03324       | 0.0348       | 217955               | 16.24660651 | 6.24118E-06 |
| rs10928560  | -0.0878        | 0.1949        | 0.0158       | 217955               | 7.376332842 | 4.44631E-05 |
| rs10938398  | 0.0577         | 0.4731        | 0.0125       | 217955               | 5.835706363 | 4.87389E-05 |
| rs11530654  | 0.0655         | 0.2633        | 0.0141       | 217955               | 6.582676777 | 3.84104E-05 |
| rs11758441  | 0.0602         | 0.378         | 0.0129       | 217955               | 6.022448966 | 4.6985E-05  |
| rs12682930  | -0.1262        | 0.0609        | 0.0262       | 217955               | 12.23164054 | 1.21761E-05 |
| rs142006783 | 0.1783         | 0.03778       | 0.0327       | 217955               | 15.26620784 | 9.9176E-06  |
| rs181190675 | -0.2193        | 0.01815       | 0.0475       | 217955               | 22.17568418 | 3.48558E-06 |
| rs182846984 | 0.2679         | 0.01414       | 0.0544       | 217955               | 25.39699409 | 3.10224E-06 |
| rs1896039   | 0.062          | 0.5349        | 0.0126       | 217955               | 5.882392013 | 5.52744E-05 |
| rs193546    | 0.0739         | 0.7438        | 0.0143       | 217955               | 6.676048079 | 4.66998E-05 |
| rs1959185   | 0.0856         | 0.1344        | 0.0182       | 217955               | 8.496788464 | 2.36148E-05 |
| rs2725231   | -0.0766        | 0.8336        | 0.0166       | 217955               | 7.749818049 | 2.71029E-05 |
| rs3996329   | -0.0757        | 0.2366        | 0.0148       | 217955               | 6.909476333 | 4.33609E-05 |
| rs405430    | -0.0693        | 0.7625        | 0.0146       | 217955               | 6.816105031 | 3.74393E-05 |
| rs4837016   | -0.0706        | 0.4662        | 0.0125       | 217955               | 5.835706363 | 7.28456E-05 |
| rs4961731   | 0.0959         | 0.8894        | 0.02         | 217955               | 9.33713018  | 2.07536E-05 |
| rs527014    | 0.1246         | 0.07433       | 0.0238       | 217955               | 11.11118491 | 1.73048E-05 |
| rs6021831   | -0.0632        | 0.2973        | 0.0136       | 217955               | 6.349248522 | 4.13985E-05 |
| rs6845679   | 0.0588         | 0.5898        | 0.0127       | 217955               | 5.929077664 | 4.75895E-05 |
| rs72632980  | 0.1148         | 0.07221       | 0.0241       | 217955               | 11.25124187 | 1.39495E-05 |
| rs72892016  | -0.0885        | 0.1204        | 0.0192       | 217955               | 8.963644973 | 2.06471E-05 |
| rs770267    | 0.0769         | 0.831         | 0.0166       | 217955               | 7.749818049 | 2.76559E-05 |
| rs78730556  | -0.1146        | 0.06738       | 0.0251       | 217955               | 11.71809838 | 1.20204E-05 |
| rs9318788   | 0.9882         | 0.001152      | 0.2164       | 217955               | 101.0277485 | 2.20186E-07 |
| rs9510253   | 0.0821         | 0.1468        | 0.0176       | 217955               | 8.216674558 | 2.50093E-05 |
| rs9937053   | 0.102          | 0.4298        | 0.0125       | 217955               | 5.835706363 | 0.00014974  |
| rs996762    | -0.0801        | 0.8239        | 0.0163       | 217955               | 7.609761097 | 3.21504E-05 |

R2

0.001046075

F

7

**Supplementary File 2. SNPs of OSA to Diabetes.**

| SNP        | beta. exposure | eaf. exposure | se. exposure | samplesize. exposure | SD          | R2          |
|------------|----------------|---------------|--------------|----------------------|-------------|-------------|
| rs1023230  | -0.1107        | 0.9223        | 0.0232       | 217955               | 10.83107101 | 1.49719E-05 |
| rs10507084 | 0.1085         | 0.1793        | 0.0163       | 217955               | 7.609761097 | 5.98291E-05 |
| rs10860169 | -0.0653        | 0.2906        | 0.0137       | 217955               | 6.395934173 | 4.29769E-05 |
| rs10938398 | 0.0577         | 0.4731        | 0.0125       | 217955               | 5.835706363 | 4.87389E-05 |
| rs193546   | 0.0739         | 0.7438        | 0.0143       | 217955               | 6.676048079 | 4.66998E-05 |
| rs1959185  | 0.0856         | 0.1344        | 0.0182       | 217955               | 8.496788464 | 2.36148E-05 |
| rs2725231  | -0.0766        | 0.8336        | 0.0166       | 217955               | 7.749818049 | 2.71029E-05 |
| rs405430   | -0.0693        | 0.7625        | 0.0146       | 217955               | 6.816105031 | 3.74393E-05 |
| rs4837016  | -0.0706        | 0.4662        | 0.0125       | 217955               | 5.835706363 | 7.28456E-05 |
| rs4961731  | 0.0959         | 0.8894        | 0.02         | 217955               | 9.33713018  | 2.07536E-05 |
| rs6021831  | -0.0632        | 0.2973        | 0.0136       | 217955               | 6.349248522 | 4.13985E-05 |
| rs6845679  | 0.0588         | 0.5898        | 0.0127       | 217955               | 5.929077664 | 4.75895E-05 |
| rs72632980 | 0.1148         | 0.07221       | 0.0241       | 217955               | 11.25124187 | 1.39495E-05 |
| rs770267   | 0.0769         | 0.831         | 0.0166       | 217955               | 7.749818049 | 2.76559E-05 |
| rs9510253  | 0.0821         | 0.1468        | 0.0176       | 217955               | 8.216674558 | 2.50093E-05 |
| rs9937053  | 0.102          | 0.4298        | 0.0125       | 217955               | 5.835706363 | 0.00014974  |
| rs996762   | -0.0801        | 0.8239        | 0.0163       | 217955               | 7.609761097 | 3.21504E-05 |

R2 0.000732466

F 9.4

**Supplementary File 3. SNPs of OSA to BMI.**

| SNP         | beta. exposure | eaf. exposure | se. exposure | samplesize. exposure | SD          | R2          |
|-------------|----------------|---------------|--------------|----------------------|-------------|-------------|
| rs1023230   | -0.1107        | 0.9223        | 0.0232       |                      | 10.83107101 | 1.49719E-05 |
| rs10507084  | 0.1085         | 0.1793        | 0.0163       |                      | 7.609761097 | 5.98291E-05 |
| rs10860169  | -0.0653        | 0.2906        | 0.0137       |                      | 6.395934173 | 4.29769E-05 |
| rs10910079  | 0.1601         | 0.03324       | 0.0348       |                      | 16.24660651 | 6.24118E-06 |
| rs10928560  | -0.0878        | 0.1949        | 0.0158       |                      | 7.376332842 | 4.44631E-05 |
| rs10938398  | 0.0577         | 0.4731        | 0.0125       |                      | 5.835706363 | 4.87389E-05 |
| rs11758441  | 0.0602         | 0.378         | 0.0129       |                      | 6.022448966 | 4.6985E-05  |
| rs12682930  | -0.1262        | 0.0609        | 0.0262       |                      | 12.23164054 | 1.21761E-05 |
| rs142006783 | 0.1783         | 0.03778       | 0.0327       |                      | 15.26620784 | 9.9176E-06  |
| rs181190675 | -0.2193        | 0.01815       | 0.0475       |                      | 22.17568418 | 3.48558E-06 |
| rs182846984 | 0.2679         | 0.01414       | 0.0544       |                      | 25.39699409 | 3.10224E-06 |
| rs1896039   | 0.062          | 0.5349        | 0.0126       |                      | 5.882392013 | 5.52744E-05 |
| rs193546    | 0.0739         | 0.7438        | 0.0143       |                      | 6.676048079 | 4.66998E-05 |
| rs1959185   | 0.0856         | 0.1344        | 0.0182       |                      | 8.496788464 | 2.36148E-05 |
| rs2725231   | -0.0766        | 0.8336        | 0.0166       |                      | 7.749818049 | 2.71029E-05 |
| rs3996329   | -0.0757        | 0.2366        | 0.0148       |                      | 6.909476333 | 4.33609E-05 |
| rs405430    | -0.0693        | 0.7625        | 0.0146       |                      | 6.816105031 | 3.74393E-05 |
| rs4837016   | -0.0706        | 0.4662        | 0.0125       |                      | 5.835706363 | 7.28456E-05 |
| rs4961731   | 0.0959         | 0.8894        | 0.02         |                      | 9.33713018  | 2.07536E-05 |
| rs527014    | 0.1246         | 0.07433       | 0.0238       |                      | 11.11118491 | 1.73048E-05 |
| rs6021831   | -0.0632        | 0.2973        | 0.0136       |                      | 6.349248522 | 4.13985E-05 |
| rs6845679   | 0.0588         | 0.5898        | 0.0127       |                      | 5.929077664 | 4.75895E-05 |
| rs72632980  | 0.1148         | 0.07221       | 0.0241       |                      | 11.25124187 | 1.39495E-05 |
| rs72892016  | -0.0885        | 0.1204        | 0.0192       |                      | 8.963644973 | 2.06471E-05 |
| rs770267    | 0.0769         | 0.831         | 0.0166       |                      | 7.749818049 | 2.76559E-05 |
| rs78730556  | -0.1146        | 0.06738       | 0.0251       |                      | 11.71809838 | 1.20204E-05 |
| rs9318788   | 0.9882         | 0.001152      | 0.2164       |                      | 101.0277485 | 2.20186E-07 |
| rs9510253   | 0.0821         | 0.1468        | 0.0176       |                      | 8.216674558 | 2.50093E-05 |
| rs9937053   | 0.102          | 0.4298        | 0.0125       |                      | 5.835706363 | 0.00014974  |
| rs996762    | -0.0801        | 0.8239        | 0.0163       |                      | 7.609761097 | 3.21504E-05 |
| R2          |                |               |              |                      |             | 0.001007664 |

F

**Supplementary File 4. SNPs of OSA to HDL.**

| SNP         | beta. exposure | eaf. exposure | se. exposure | samplesize. exposure | SD          | R2          |
|-------------|----------------|---------------|--------------|----------------------|-------------|-------------|
| rs1023230   | -0.1107        | 0.9223        | 0.0232       |                      | 10.83107101 | 1.49719E-05 |
| rs10507084  | 0.1085         | 0.1793        | 0.0163       |                      | 7.609761097 | 5.98291E-05 |
| rs10860169  | -0.0653        | 0.2906        | 0.0137       |                      | 6.395934173 | 4.29769E-05 |
| rs10910079  | 0.1601         | 0.03324       | 0.0348       |                      | 16.24660651 | 6.24118E-06 |
| rs10928560  | -0.0878        | 0.1949        | 0.0158       |                      | 7.376332842 | 4.44631E-05 |
| rs10938398  | 0.0577         | 0.4731        | 0.0125       |                      | 5.835706363 | 4.87389E-05 |
| rs11530654  | 0.0655         | 0.2633        | 0.0141       |                      | 6.582676777 | 3.84104E-05 |
| rs11758441  | 0.0602         | 0.378         | 0.0129       |                      | 6.022448966 | 4.6985E-05  |
| rs12682930  | -0.1262        | 0.0609        | 0.0262       |                      | 12.23164054 | 1.21761E-05 |
| rs142006783 | 0.1783         | 0.03778       | 0.0327       |                      | 15.26620784 | 9.9176E-06  |
| rs181190675 | -0.2193        | 0.01815       | 0.0475       |                      | 22.17568418 | 3.48558E-06 |
| rs182846984 | 0.2679         | 0.01414       | 0.0544       |                      | 25.39699409 | 3.10224E-06 |
| rs1896039   | 0.062          | 0.5349        | 0.0126       |                      | 5.882392013 | 5.52744E-05 |
| rs193546    | 0.0739         | 0.7438        | 0.0143       |                      | 6.676048079 | 4.66998E-05 |
| rs1959185   | 0.0856         | 0.1344        | 0.0182       |                      | 8.496788464 | 2.36148E-05 |
| rs2725231   | -0.0766        | 0.8336        | 0.0166       |                      | 7.749818049 | 2.71029E-05 |
| rs3996329   | -0.0757        | 0.2366        | 0.0148       |                      | 6.909476333 | 4.33609E-05 |
| rs405430    | -0.0693        | 0.7625        | 0.0146       |                      | 6.816105031 | 3.74393E-05 |
| rs4837016   | -0.0706        | 0.4662        | 0.0125       |                      | 5.835706363 | 7.28456E-05 |
| rs4961731   | 0.0959         | 0.8894        | 0.02         |                      | 9.33713018  | 2.07536E-05 |
| rs527014    | 0.1246         | 0.07433       | 0.0238       |                      | 11.11118491 | 1.73048E-05 |
| rs6845679   | 0.0588         | 0.5898        | 0.0127       |                      | 5.929077664 | 4.75895E-05 |
| rs72632980  | 0.1148         | 0.07221       | 0.0241       |                      | 11.25124187 | 1.39495E-05 |
| rs72892016  | -0.0885        | 0.1204        | 0.0192       |                      | 8.963644973 | 2.06471E-05 |
| rs770267    | 0.0769         | 0.831         | 0.0166       |                      | 7.749818049 | 2.76559E-05 |
| rs78730556  | -0.1146        | 0.06738       | 0.0251       |                      | 11.71809838 | 1.20204E-05 |
| rs9318788   | 0.9882         | 0.001152      | 0.2164       |                      | 101.0277485 | 2.20186E-07 |
| rs9510253   | 0.0821         | 0.1468        | 0.0176       |                      | 8.216674558 | 2.50093E-05 |
| rs9937053   | 0.102          | 0.4298        | 0.0125       |                      | 5.835706363 | 0.00014974  |
| rs996762    | -0.0801        | 0.8239        | 0.0163       |                      | 7.609761097 | 3.21504E-05 |
| R2          |                |               |              |                      |             | 0.001004676 |

F

**Supplementary File 5. SNPs of OSA to Triglycerides.**

| SNP         | beta. exposure | eaf. exposure | se. exposure | samplesize. exposure | SD          | R2          |
|-------------|----------------|---------------|--------------|----------------------|-------------|-------------|
| rs1023230   | -0.1107        | 0.9223        | 0.0232       |                      | 10.83107101 | 1.49719E-05 |
| rs10507084  | 0.1085         | 0.1793        | 0.0163       |                      | 7.609761097 | 5.98291E-05 |
| rs10860169  | -0.0653        | 0.2906        | 0.0137       |                      | 6.395934173 | 4.29769E-05 |
| rs10910079  | 0.1601         | 0.03324       | 0.0348       |                      | 16.24660651 | 6.24118E-06 |
| rs10928560  | -0.0878        | 0.1949        | 0.0158       |                      | 7.376332842 | 4.44631E-05 |
| rs10938398  | 0.0577         | 0.4731        | 0.0125       |                      | 5.835706363 | 4.87389E-05 |
| rs11530654  | 0.0655         | 0.2633        | 0.0141       |                      | 6.582676777 | 3.84104E-05 |
| rs11758441  | 0.0602         | 0.378         | 0.0129       |                      | 6.022448966 | 4.6985E-05  |
| rs12682930  | -0.1262        | 0.0609        | 0.0262       |                      | 12.23164054 | 1.21761E-05 |
| rs142006783 | 0.1783         | 0.03778       | 0.0327       |                      | 15.26620784 | 9.9176E-06  |
| rs181190675 | -0.2193        | 0.01815       | 0.0475       |                      | 22.17568418 | 3.48558E-06 |
| rs182846984 | 0.2679         | 0.01414       | 0.0544       |                      | 25.39699409 | 3.10224E-06 |
| rs1896039   | 0.062          | 0.5349        | 0.0126       |                      | 5.882392013 | 5.52744E-05 |
| rs193546    | 0.0739         | 0.7438        | 0.0143       |                      | 6.676048079 | 4.66998E-05 |
| rs1959185   | 0.0856         | 0.1344        | 0.0182       |                      | 8.496788464 | 2.36148E-05 |
| rs2725231   | -0.0766        | 0.8336        | 0.0166       |                      | 7.749818049 | 2.71029E-05 |
| rs3996329   | -0.0757        | 0.2366        | 0.0148       |                      | 6.909476333 | 4.33609E-05 |
| rs405430    | -0.0693        | 0.7625        | 0.0146       |                      | 6.816105031 | 3.74393E-05 |
| rs4837016   | -0.0706        | 0.4662        | 0.0125       |                      | 5.835706363 | 7.28456E-05 |
| rs4961731   | 0.0959         | 0.8894        | 0.02         |                      | 9.33713018  | 2.07536E-05 |
| rs527014    | 0.1246         | 0.07433       | 0.0238       |                      | 11.11118491 | 1.73048E-05 |
| rs6845679   | 0.0588         | 0.5898        | 0.0127       |                      | 5.929077664 | 4.75895E-05 |
| rs72632980  | 0.1148         | 0.07221       | 0.0241       |                      | 11.25124187 | 1.39495E-05 |
| rs72892016  | -0.0885        | 0.1204        | 0.0192       |                      | 8.963644973 | 2.06471E-05 |
| rs770267    | 0.0769         | 0.831         | 0.0166       |                      | 7.749818049 | 2.76559E-05 |
| rs78730556  | -0.1146        | 0.06738       | 0.0251       |                      | 11.71809838 | 1.20204E-05 |
| rs9318788   | 0.9882         | 0.001152      | 0.2164       |                      | 101.0277485 | 2.20186E-07 |
| rs9510253   | 0.0821         | 0.1468        | 0.0176       |                      | 8.216674558 | 2.50093E-05 |
| rs9937053   | 0.102          | 0.4298        | 0.0125       |                      | 5.835706363 | 0.00014974  |
| rs996762    | -0.0801        | 0.8239        | 0.0163       |                      | 7.609761097 | 3.21504E-05 |

R2

0.001004676

F

7

**Supplementary File 6. SNPs of OSA to Cardiovascular disease.**

| SNP         | beta. exposure | eaf. exposure | se. exposure | samplesize. exposure | SD          | R2          |
|-------------|----------------|---------------|--------------|----------------------|-------------|-------------|
| rs1023230   | -0.1107        | 0.9223        | 0.0232       | 217955               | 10.83107101 | 1.49719E-05 |
| rs10507084  | 0.1085         | 0.1793        | 0.0163       | 217955               | 7.609761097 | 5.98291E-05 |
| rs10860169  | -0.0653        | 0.2906        | 0.0137       | 217955               | 6.395934173 | 4.29769E-05 |
| rs10910079  | 0.1601         | 0.03324       | 0.0348       | 217955               | 16.24660651 | 6.24118E-06 |
| rs10928560  | -0.0878        | 0.1949        | 0.0158       | 217955               | 7.376332842 | 4.44631E-05 |
| rs10938398  | 0.0577         | 0.4731        | 0.0125       | 217955               | 5.835706363 | 4.87389E-05 |
| rs11530654  | 0.0655         | 0.2633        | 0.0141       | 217955               | 6.582676777 | 3.84104E-05 |
| rs11758441  | 0.0602         | 0.378         | 0.0129       | 217955               | 6.022448966 | 4.6985E-05  |
| rs12682930  | -0.1262        | 0.0609        | 0.0262       | 217955               | 12.23164054 | 1.21761E-05 |
| rs142006783 | 0.1783         | 0.03778       | 0.0327       | 217955               | 15.26620784 | 9.9176E-06  |
| rs181190675 | -0.2193        | 0.01815       | 0.0475       | 217955               | 22.17568418 | 3.48558E-06 |
| rs182846984 | 0.2679         | 0.01414       | 0.0544       | 217955               | 25.39699409 | 3.10224E-06 |
| rs1896039   | 0.062          | 0.5349        | 0.0126       | 217955               | 5.882392013 | 5.52744E-05 |
| rs193546    | 0.0739         | 0.7438        | 0.0143       | 217955               | 6.676048079 | 4.66998E-05 |
| rs1959185   | 0.0856         | 0.1344        | 0.0182       | 217955               | 8.496788464 | 2.36148E-05 |
| rs2725231   | -0.0766        | 0.8336        | 0.0166       | 217955               | 7.749818049 | 2.71029E-05 |
| rs3996329   | -0.0757        | 0.2366        | 0.0148       | 217955               | 6.909476333 | 4.33609E-05 |
| rs405430    | -0.0693        | 0.7625        | 0.0146       | 217955               | 6.816105031 | 3.74393E-05 |
| rs4837016   | -0.0706        | 0.4662        | 0.0125       | 217955               | 5.835706363 | 7.28456E-05 |
| rs4961731   | 0.0959         | 0.8894        | 0.02         | 217955               | 9.33713018  | 2.07536E-05 |
| rs527014    | 0.1246         | 0.07433       | 0.0238       | 217955               | 11.11118491 | 1.73048E-05 |
| rs6021831   | -0.0632        | 0.2973        | 0.0136       | 217955               | 6.349248522 | 4.13985E-05 |
| rs6845679   | 0.0588         | 0.5898        | 0.0127       | 217955               | 5.929077664 | 4.75895E-05 |
| rs72632980  | 0.1148         | 0.07221       | 0.0241       | 217955               | 11.25124187 | 1.39495E-05 |
| rs72892016  | -0.0885        | 0.1204        | 0.0192       | 217955               | 8.963644973 | 2.06471E-05 |
| rs770267    | 0.0769         | 0.831         | 0.0166       | 217955               | 7.749818049 | 2.76559E-05 |
| rs78730556  | -0.1146        | 0.06738       | 0.0251       | 217955               | 11.71809838 | 1.20204E-05 |
| rs9318788   | 0.9882         | 0.001152      | 0.2164       | 217955               | 101.0277485 | 2.20186E-07 |
| rs9510253   | 0.0821         | 0.1468        | 0.0176       | 217955               | 8.216674558 | 2.50093E-05 |
| rs9937053   | 0.102          | 0.4298        | 0.0125       | 217955               | 5.835706363 | 0.00014974  |
| rs996762    | -0.0801        | 0.8239        | 0.0163       | 217955               | 7.609761097 | 3.21504E-05 |

R2

0.001046075

F

7

**Supplementary Figure 1.** The MR “leave-one-out” sensitivity analysis. (A) OSA to Hypertention.

(B) OSA to Diabetes. (C) OSA to BMI. (D) OSA to HDL. (E) OSA to Triglycerides. (F) OSA to

Cardiovascular disease.

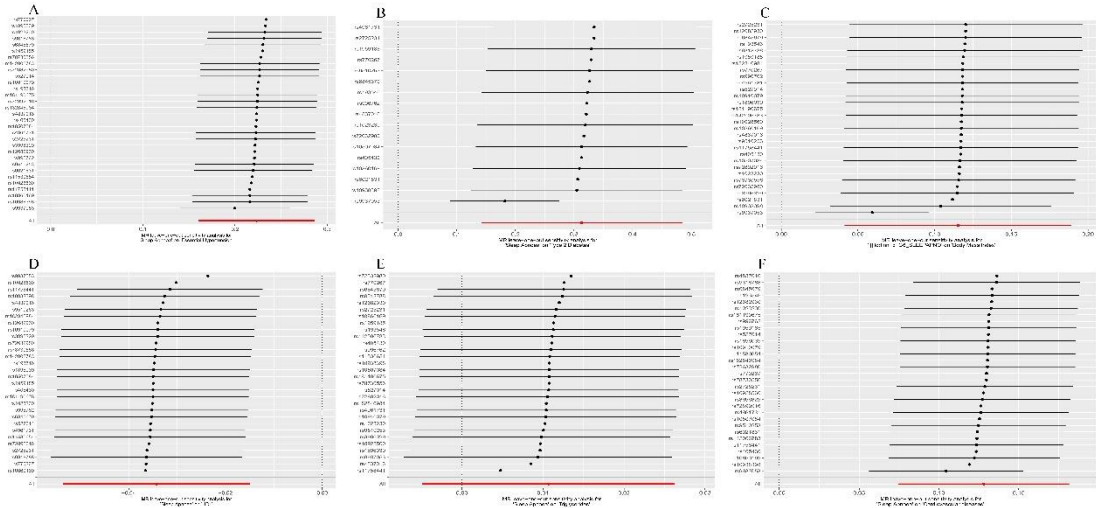

**Supplementary Figure 2.** Funnel plots of OSA with Mets. The X-axis represents odds ratio (OR), and the Y-axis represents standard error (SE). (A) OSA to Hypertention. (B) OSA to Diabetes. (C) OSA to BMI. (D) OSA to HDL. (E) OSA to Triglycerides. (F) OSA to Cardiovascular disease.

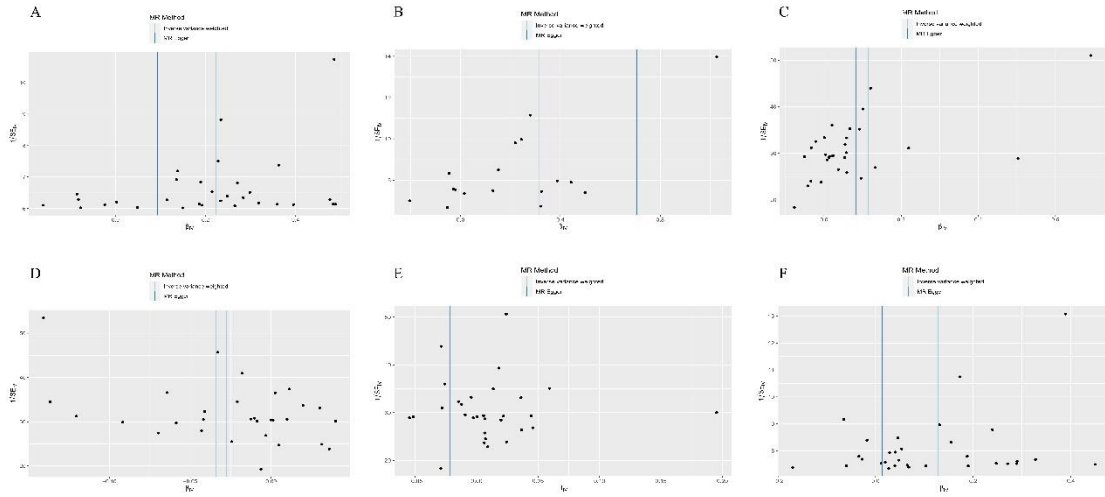

Supplement: Supplementary file 1 [file get_supplementary_file.php]
